# Supplementary material
Source: Springer Nature journal article supplement (https://www.springermedizin.de/resource/supplementary/12958_2008_479_MOESM6_ESM.pdf/9568266)

A  
b  
s

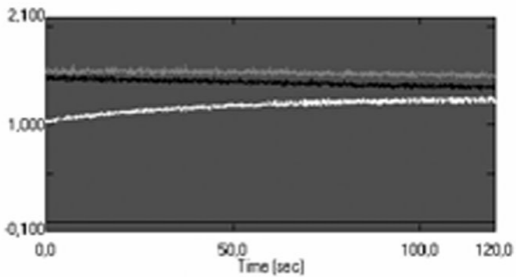

Supplement: MOESM6 [file 9568266]
